# Supplementary material for: MeJA Elicitation of Chicory Hairy Roots Promotes Efficient Increase of 3,5-diCQA Accumulation, a Potent Antioxidant and Antibacterial Molecule
Source: MDPI journal article supplement (doi:10.3390/antibiotics9100659), 2020-09-30

**Supplementary Figure S1 .** Analytical HPLC chromatogram (A) and preparative HPLC chromatogram (B) of ethyl acetate sub-extract from hairy root elicited with MeJA: (1) di-CQA; (2) tri-CQA.

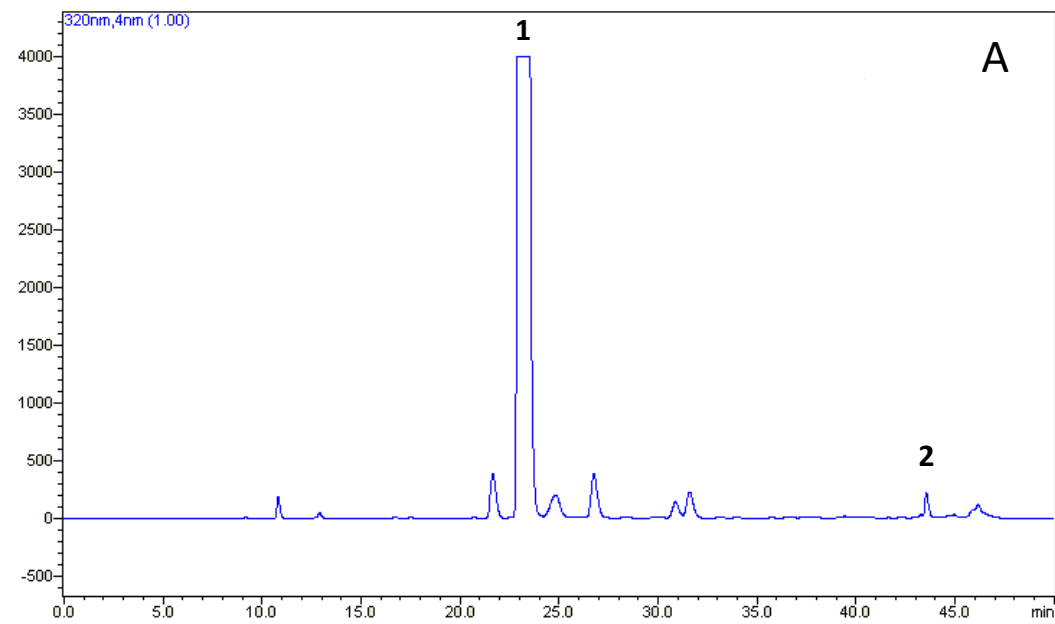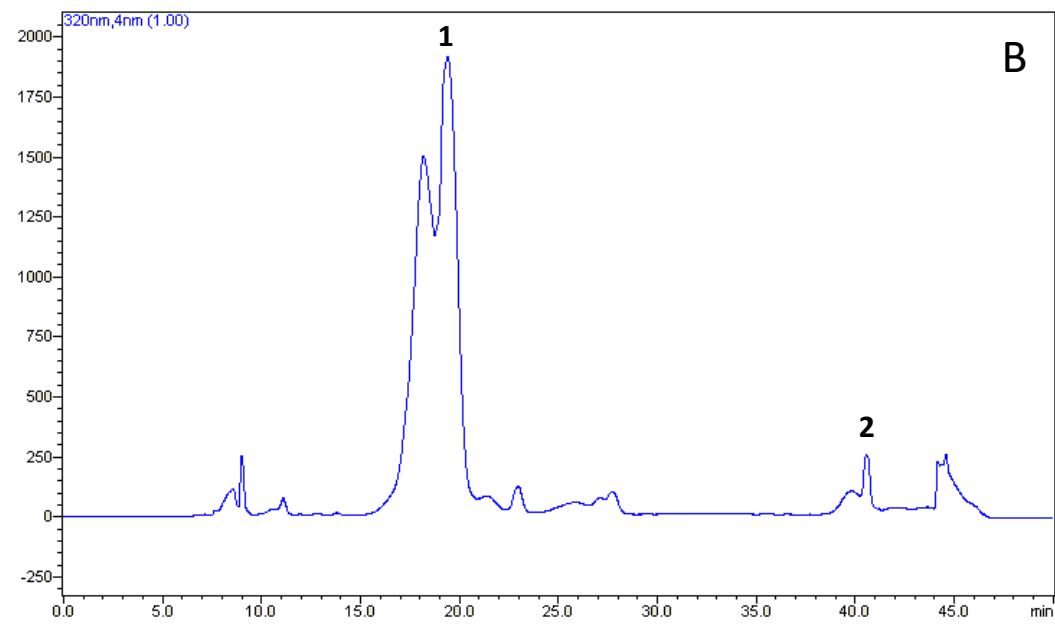

Supplement: s1 [file s1]
