# Supplementary material for: MeJA Elicitation of Chicory Hairy Roots Promotes Efficient Increase of 3,5-diCQA Accumulation, a Potent Antioxidant and Antibacterial Molecule
Source: Antibiotics (Basel). 2020 Sep 30;9(10):659. doi: 10.3390/antibiotics9100659 (PMC7601367; doi:10.3390/antibiotics9100659)
Supplement: Supplementary file 1 [file antibiotics-09-00659-s001.zip]

Archive with 4 entries (4 files):
- Supplementary Figure S1.pdf
- __MACOSX/._Supplementary Figure S1.pdf
- Supplementary Figure S2.pdf
- __MACOSX/._Supplementary Figure S2.pdf
